# Supplementary material for: Stress/Immune Biomarkers in Saliva among Children with ADHD Status
Source: MDPI journal article supplement (doi:10.3390/ijerph18020769), 2021-01-18

Figure S1. Flow chart of the study.

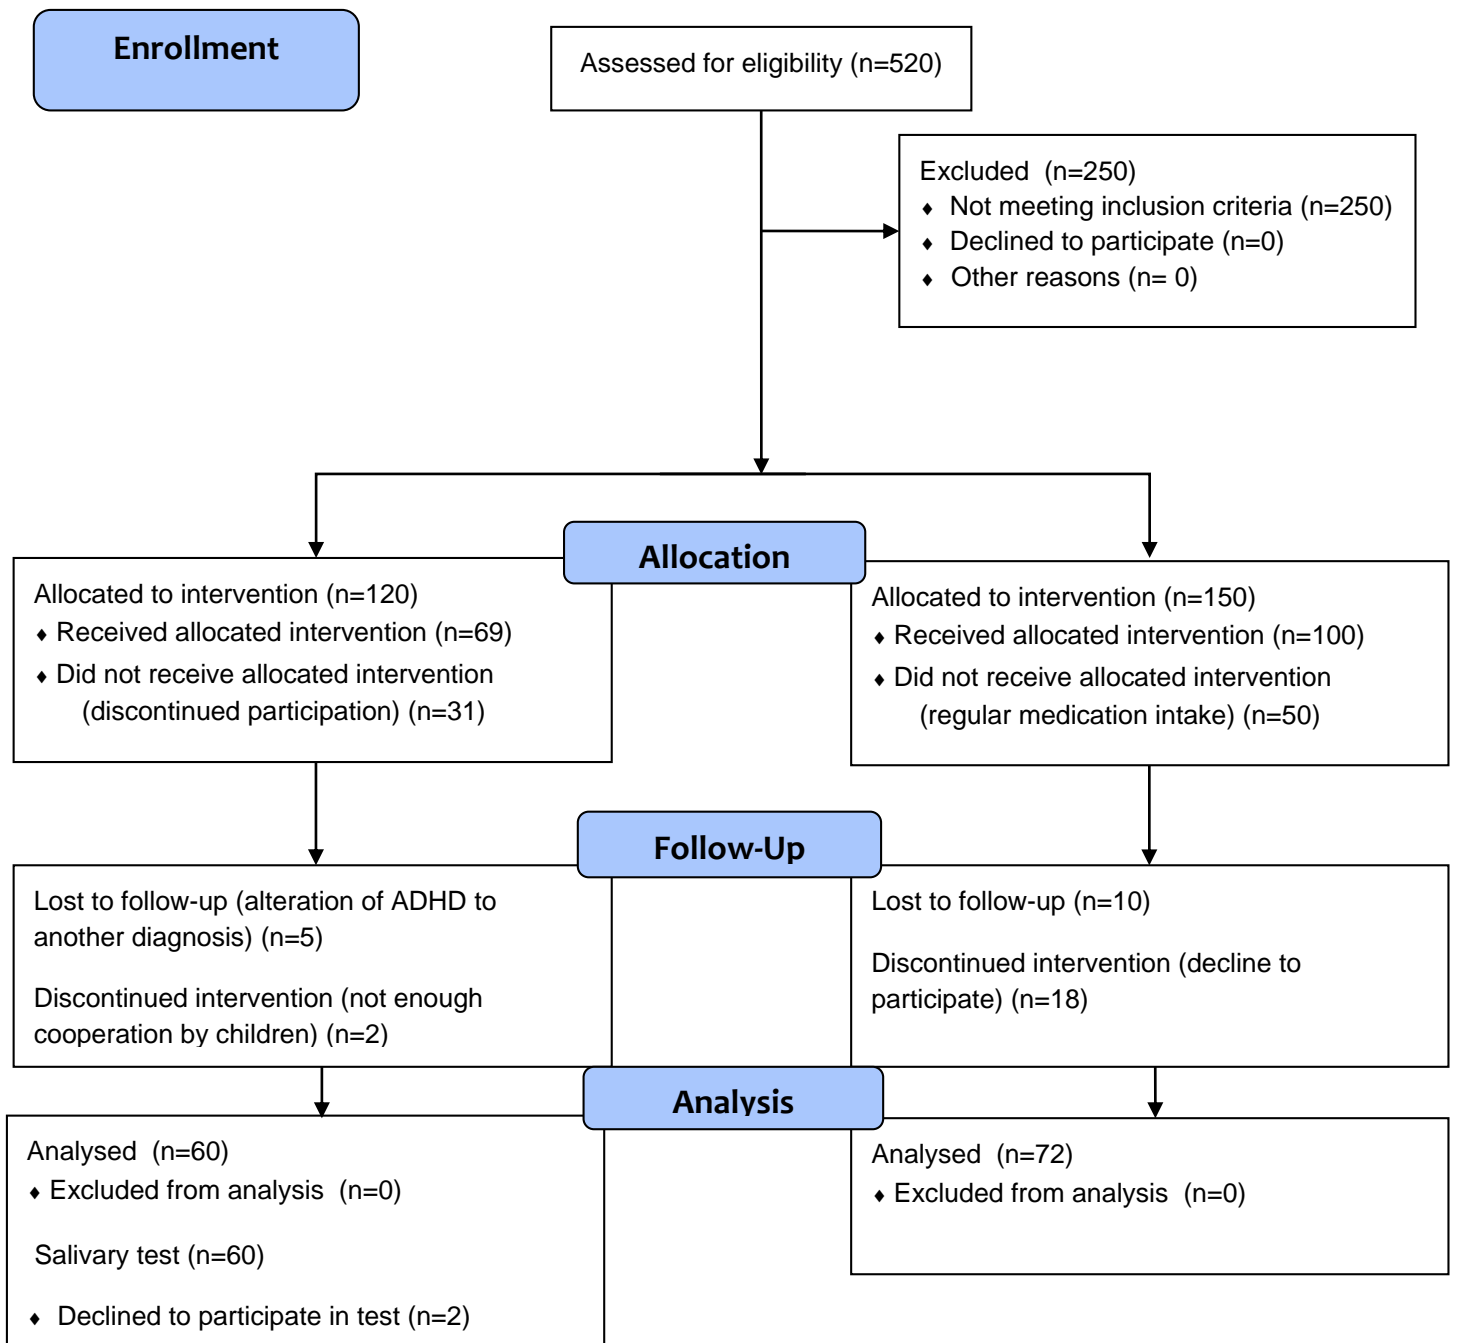

Supplement: s1 [file s1]
